# Supplementary material
Source: HighWire-hosted journal article supplement (https://thorax.bmj.com/content/suppl/2003/07/30/58.8.674)
Supplement: 588674T5.pdf [file 588674T5.pdf]

**Table 5** Postal questionnaire sent to subjects at least 6 weeks after completing the study

| Question                                                                                                                                  | Answer                | Control<br>(n=24/29) | Buteyko<br>(n=23/30) | PCLE<br>(n=25/30) |
|-------------------------------------------------------------------------------------------------------------------------------------------|-----------------------|----------------------|----------------------|-------------------|
| 1. How many minutes per day on average did you practise your breathing exercises?                                                         | 0–5                   | 3                    |                      | 5                 |
|                                                                                                                                           | 6–10                  | 3                    |                      | 6                 |
|                                                                                                                                           | 11–20                 | 6                    |                      | 5                 |
|                                                                                                                                           | 21–30                 | 10                   |                      | 8                 |
|                                                                                                                                           | >30                   | 1                    |                      | 1                 |
|                                                                                                                                           |                       | Median 11–20         |                      | Median 11–20      |
| 2. How many times per day on average did you practise your breathing exercises?                                                           | <1                    |                      | 0                    |                   |
|                                                                                                                                           | 1                     |                      | 1                    |                   |
|                                                                                                                                           | 2                     |                      | 22                   |                   |
|                                                                                                                                           | 3 or more             |                      | 0                    |                   |
| 3. How many nights on average did you tape your mouth?                                                                                    | 0                     |                      | 4                    |                   |
|                                                                                                                                           | 1–2                   |                      | 3                    |                   |
|                                                                                                                                           | 3–4                   |                      | 2                    |                   |
|                                                                                                                                           | 5–6                   |                      | 6                    |                   |
|                                                                                                                                           | Every                 |                      | 8                    |                   |
|                                                                                                                                           |                       |                      | Median 5–6           |                   |
| 4. How many times per week on average were you unable to practise your breathing exercises?                                               | 0                     | 4                    | 6                    | 3                 |
|                                                                                                                                           | 1–2                   | 13                   | 14                   | 15                |
|                                                                                                                                           | 3–5                   | 4                    | 3                    | 6                 |
|                                                                                                                                           | 6–10                  | 0                    | 0                    | 0                 |
|                                                                                                                                           | >10                   | 2                    | 0                    | 1                 |
|                                                                                                                                           |                       | Median 1–2           | Median 1–2           | Median 1–2        |
| 5. Would you have liked more contact with Buteyko trainers during the study?                                                              | Yes                   |                      | 9                    |                   |
|                                                                                                                                           | No                    |                      | 14                   |                   |
| 6. Have you continued to use your breathing exercises since finishing the study?                                                          | Yes                   | 9                    | 16                   | 12                |
|                                                                                                                                           | No                    | 15                   | 7                    | 13                |
| 7. If you practised the exercises less as you went through the study or if you decided to withdraw from the study what were your reasons? | Lack of time          | 6                    | 2                    | 5                 |
|                                                                                                                                           | Lack of efficacy      | 7                    | 2                    | 8                 |
|                                                                                                                                           | Not keen on technique | 4                    | 1                    | 2                 |
|                                                                                                                                           | Boredom               | 1                    | 2                    | 1                 |
|                                                                                                                                           | Health reasons        | 0                    | 3                    | 1                 |
|                                                                                                                                           | Asthma improved       | 3                    | 3                    | 1                 |
|                                                                                                                                           | Other                 | 0                    | 1                    | 1                 |
| Total no of respondents (some subjects gave more than one reason)                                                                         |                       | 11                   | 11                   | 16                |

PCLE=Pink City Lung Exerciser.
